# Supplementary material for: Enhancing the electrochemical catalytic performance of novel bifunctional oxygen vacancy-enriched silver niobate (AgNbO 3 ) through electrochemical activation
Source: Royal Society of Chemistry journal article supplement (doi:10.1039/d4ta06718e), 2025-01-01

**Enhancing the Electrochemical Catalytic Performance of Novel Bifunctional Oxygen  
Vacancy-Enriched Silver Niobate (AgNbO<sub>3</sub>) through Electrochemical Activation**

Deepak Rajaram Patil<sup>1</sup>, Harish S. Chavan<sup>1</sup>, Ah-yeong Lee<sup>1</sup>, Geon Lee<sup>2</sup>, Jungho Ryu<sup>2</sup>, Younggon  
Son<sup>1</sup>, Kiyoung Lee\*<sup>1</sup>,

*<sup>1</sup>Department of Chemistry and Chemical Engineering, Inha University, 100 inha-ro, Michuhol-  
gu, 22212 Incheon, Republic of Korea*

*<sup>2</sup>School of Materials Science and Engineering, Yeungnam University, Gyeongsan, Gyeongbuk  
38541, Republic of Korea*

**Figure S1** Photograph of ANO film fabricated by aerosol deposition technique.

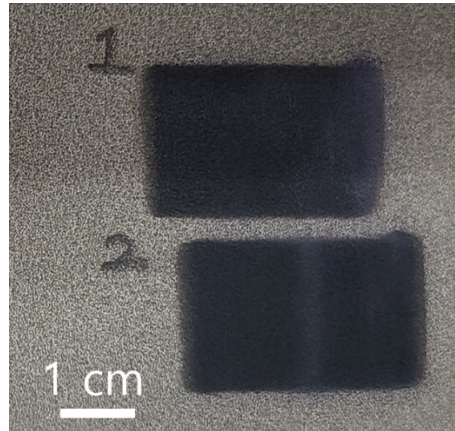

**Figure S2 (a)** The EDS spectrum for ANO electrode, (b) detailed elemental composition outlined in Table S1.

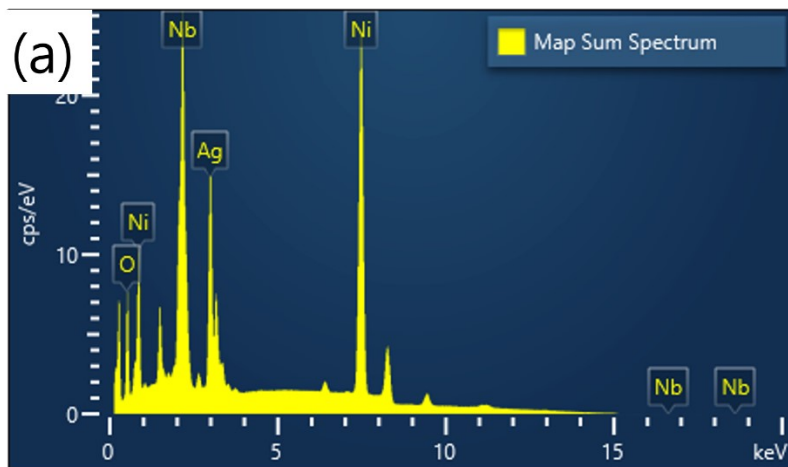

(b) Map Sum Spectrum

| Element | Wt%    | Atomic % |
|---------|--------|----------|
| O       | 6.74   | 23.35    |
| Ni      | 64.13  | 60.53    |
| Nb      | 13.95  | 8.32     |
| Ag      | 15.18  | 7.80     |
| Total:  | 100.00 | 100.00   |

**Figure S3** Survey spectrum and elemental composition of ANO film.

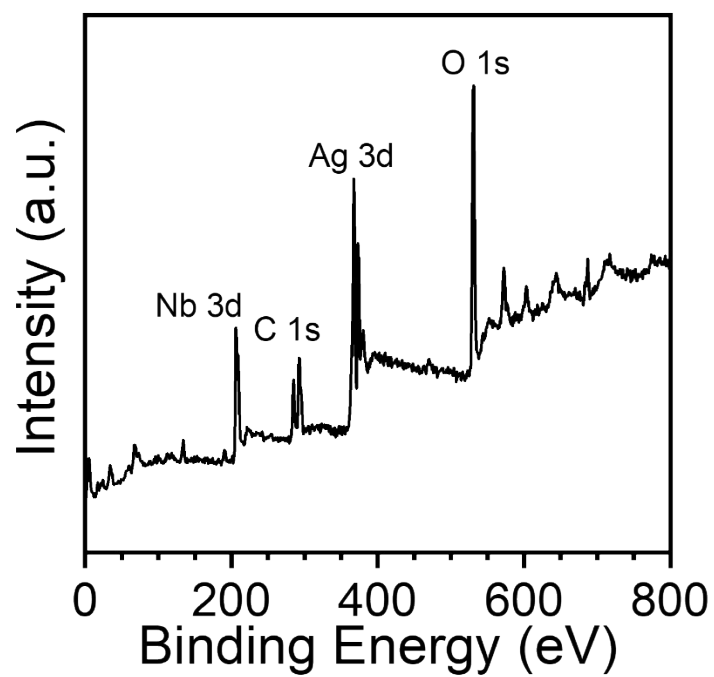

| Map Sum Spectrum |          |
|------------------|----------|
| Element          | Atomic % |
| Ag               | 4.78     |
| Nb               | 4.81     |
| O                | 40.61    |
| C                | 49.8     |
| Total:           | 100.00   |

**Figure S4** (a) Electrochemical activation of ANO film through Cyclic voltammetry. (b) Raman spectra of ANO film following different CV cycles. (c) Electrochemical activation of RuO<sub>2</sub> film through CV. (d) LSV curves of Ni foam following different CV cycles.

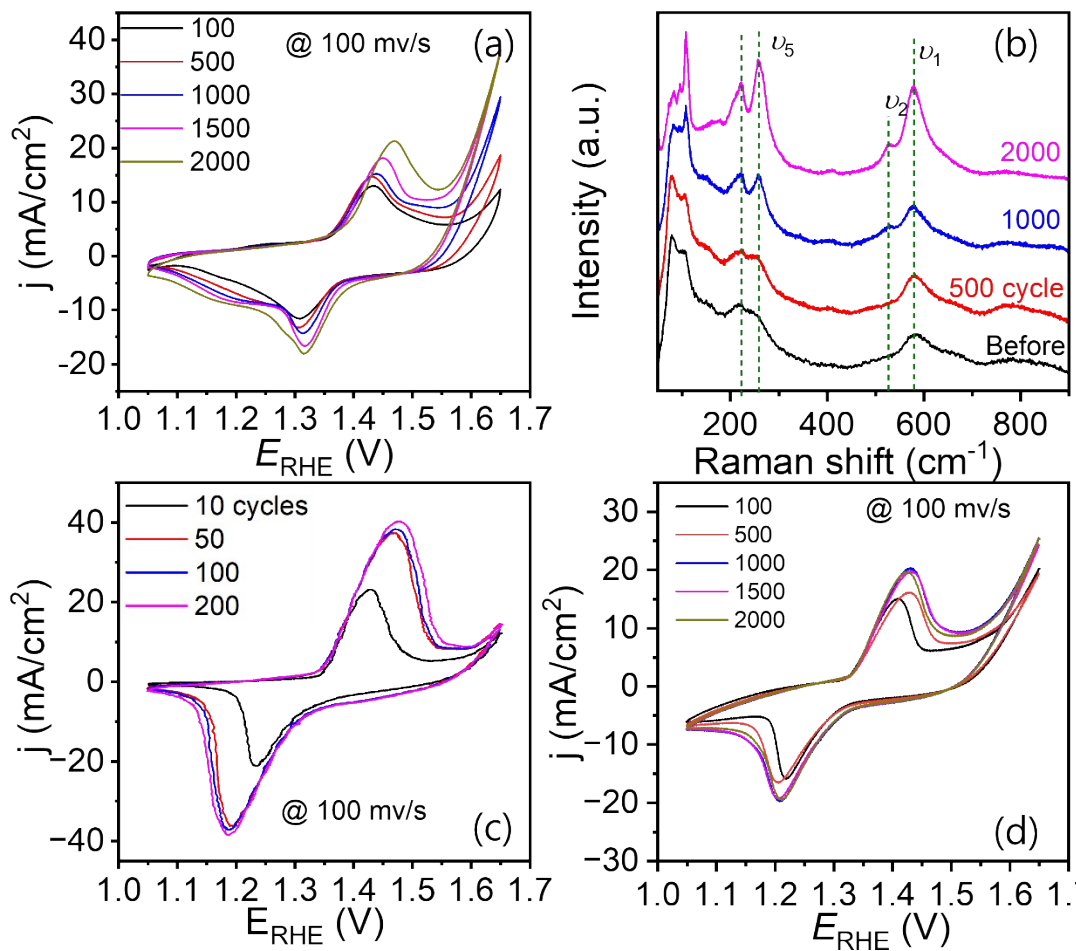

**Table S1** Equivalent circuit diagram used for modelling of Nyquist curves and Table showing fitted resistance values.

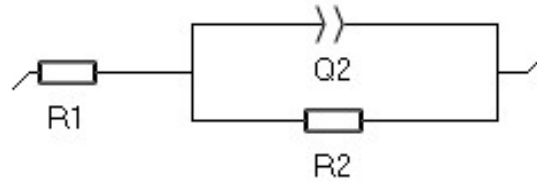

| No of cycles | R1 ( $\Omega$ ) | R2 ( $\Omega$ ) |
|--------------|-----------------|-----------------|
| 1.698        | 1.707           | 86.78           |
| 500          | 1.414           | 11.11           |
| 1000         | 1.421           | 5.92            |
| 1500         | 1.461           | 3.453           |
| 2000         | 1.679           | 3.018           |

**Figure S5** (a) Cyclic voltammetry (CV) curves of ANO electrocatalysts at different scan rates to determine ECSA. (b) electrochemical double-layer capacity ( $C_{dl}$ ) of ANO

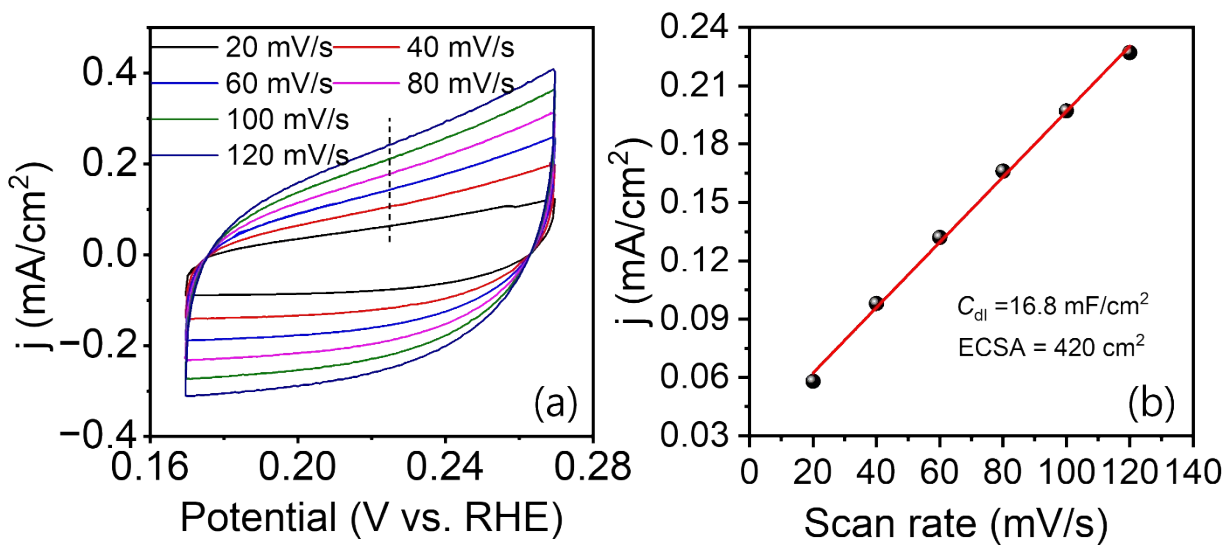

**Fig S6** Stability test of ANO electrocatalysts at current density of  $100 \text{ mA cm}^{-1}$  over 75 hours.

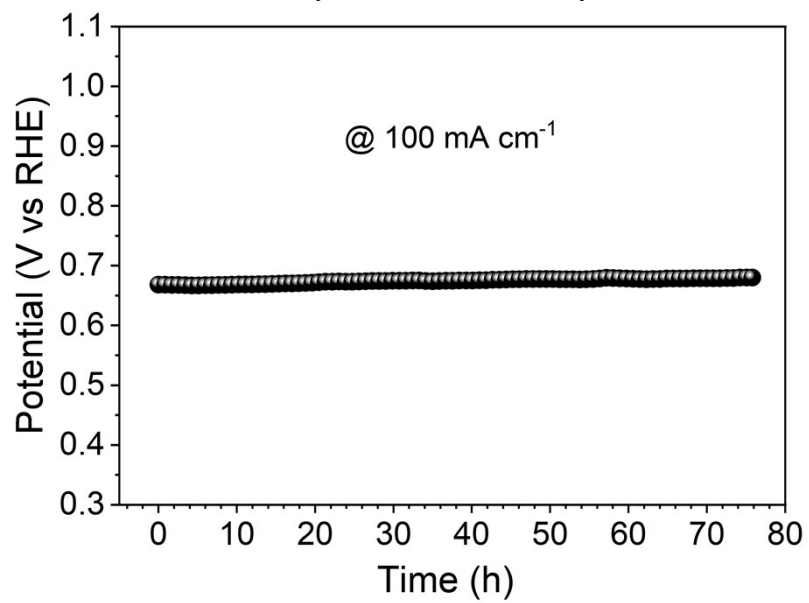

**Figure S7** Photograph of water electrolyzer employing ANO electrodes as both the anode and cathode in a 1 M KOH electrolyte.

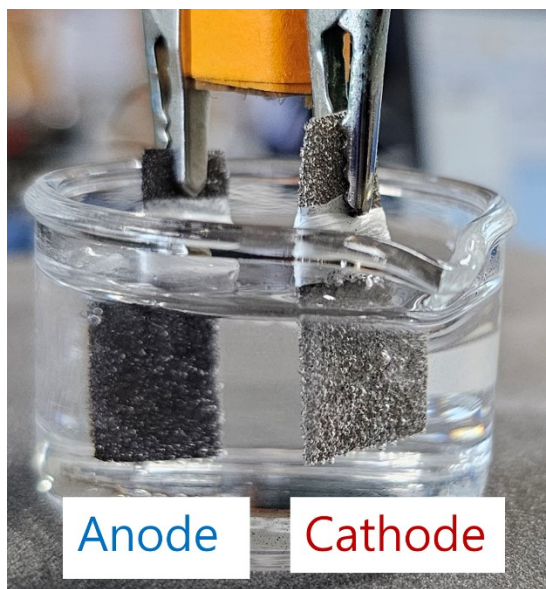

Supplement: d4ta06718e1.pdf [file d4ta06718e1.pdf]
